# Supplementary material
Source: Research Square preprint supplement (doi:10.21203/rs.3.rs-9495408/v1)
Supplement: Supplementary file 2 [file f68737c778252abba5ab1643.docx]

Table 1. Demographic characteristics, main comorbidities, SAPS II and 24h SOFA score, main clinical characteristics at baseline and main clinical outcomes for the total population, survivors and nonsurvivors.

|  | Total (n = 94) | Survivor (n= 72) | Nonsurvivor (n = 22) | p-val |
| --- | --- | --- | --- | --- |
| Age, mean (SD) | 61 (16) | 58 (16) | 69 (11) | < 0.01 |
| Male (%) | 49 (52.1) | 32 (44.4) | 17 (77.3) | 0.01 |
| Admission diagnosis (%) |  |  |  | 0.40 |
| Acute brain injury (%) | 39 (41.9) | 33 (46.5) | 6 (27.3) |  |
| Acute respiratory failure (%) | 8 ( 8.6) | 6 ( 8.5) | 2 (9.1) |  |
| Non-septic shock (%) | 15 (16.1) | 12 (16.9) | 3 (13.6) |  |
| Sepsis and septic shock (%) | 31 (33.3) | 20 (28.2) | 11 (50.0) |  |
| Hypertension (%) | 40 (42.6) | 31 (43.1) | 9 (40.9) | 1.00 |
| Diabetes (%) | 19 (20.2) | 14 (19.4) | 5 (22.7) | 0.97 |
| Atherosclerosis (%) | 17 (18.1) | 11 (15.3) | 6 (27.3) | 0.34 |
| Chronic respiratory disease (%) | 13 (13.8) | 8 (11.1) | 5 (22.7) | 0.30 |
| Chronic cardiac disease (%) | 17 (18.1) | 8 (11.1) | 9 (40.9) | < 0.01 |
| Active smoking (%) | 16 (17.0) | 11 (15.3) | 5 (22.7) | 0.62 |
| Chronic alcoholism (%) | 12 (12.8) | 5 ( 6.9) | 7 (31.8) | < 0.01 |
| Neoplasia (%) | 15 (16.0) | 8 (11.1) | 7 (31.8) | 0.05 |
| Charlson score, mean (SD) | 3.9 (3.0) | 3.5 (3.0) | 5.0 (2.8) | 0.03 |
| SAPS II, mean (SD) | 43.7 (17.8) | 40.4 (16.7) | 54.7 (17.3) | < 0.01 |
| SOFA at 24h, mean (SD) | 5.7 (3.9) | 4.8 (3.6) | 8.6 (3.5) | < 0.01 |
| Mechanical ventilation (%) | 61 (64.9) | 41 (56.9) | 20 (90.9) | < 0.05 |
| Vasopressors (%) | 53 (58.2) | 34 (48.6) | 19 (90.5) | < 0.05 |
| KDIGO 3 AKI (%) | 17 (18.1) | 9 (12.5) | 8 (36.4) | < 0.05 |
| Length of stay, mean (SD) | 12.4 (14.1) | 13.0 (15.6) | 10.2 (7.1) | 0.41 |
| No. of ICU-free days, mean (SD) | 15.1 (10.5) | 19.1 (8.3) | 2.0 (4.5) | < 0.05 |
| Death at day 28 (%) | 22 (23.4) | 0 (0) | 22 (100) | < 0.01 |

Data are expressed as mean (SD) or number (%). p-val = p value, SAPS II = Simplified Acute Physiology Score II, SOFA = Sequential Organ Failure Assessment, AKI = Acute Kidney Injury, KDIGO = Kidney Disease Improving Global Outcomes, ICU = Intensive Care Unit.

Reported p-values refer to the comparison between Survivors and Nonsurvivors.

Table 2. Mean PtCO₂ and PatCO₂ values during the first 48h following ICU admission.

|  | All,  n = 94 | Survivors n= 72 | Nonsurvivorsn= 22 | p-val | Early NS  n = 7 | Late NS  n = 15 | p-val |
| --- | --- | --- | --- | --- | --- | --- | --- |
| PtCO₂ at baseline | 53.9 (11.7) | 54.0 (9.6) | 53.9 (17.1) | 0.98 | 65.4 (25.5) | 48.5 (7.9) | 0.03 |
| Day 1 mean PtCO₂ | 54.5 (11.5) | 53.9 (8.3) | 56.3 (18.6) | 0.57 | 70.7 (26.5) | 49.5 (8.1) | 0.07 |
| Day 2 mean PtCO₂ | 54.2 (12.0) | 52.6 (7.1) | 60.0 (21.3) | 0.16 | 71.2 (27.1) | 55.7 (18.0) | 0.55 |
| 48h mean PtCO₂ | 54.5 (11.3) | 53.2 (6.8) | 58.7 (19.6) | 0.21 | 72.9 (27.7) | 52.1 (10.0) | 0.68 |
| PatCO₂ at baseline | 17.9 (10.4) | 17.0 (9.0) | 20.4 (13.3) | 0.31 | 28.2 (20.7) | 16.1 (3.4) | 0.57 |
| Day 1 mean PatCO₂ | 18.3 (10.5) | 16.9 (6.9) | 21.8 (16.5) | 0.19 | 35.3 (23.6) | 15.5 (6.0) | 0.42 |
| Day 2 mean PatCO₂ | 15.7 (11.7) | 12.7 (5.4) | 23.1 (18.3) | 0.03 | 35.3 (26.3) | 18.4 (12.6) | 0.14 |
| 48h mean PatCO₂ | 17.6 (10.4) | 15.6 (5.1) | 23.2 (17.4) | 0.06 | 36.6 (24.6) | 16.9 (8.1) | 0.57 |
| ∆(d2-d1)PatCO₂ | -2.1 (10.8) | -4.6 (8.0) | 3.6 (14.2) | 0.03 | 4.8 (23.5) | 3.2 (10.1) | 0.02 |

PtCO₂ and PatCO₂ mean (SD) values at baseline, during day 1, day 2, the first 48h following admission, and PatCO₂ variation between day 1 and day 2, expressed in mmHg. Nonsurvivors were stratified into early (≤ day 7) and late (between day 7 and day 28) deaths.

NS : nonsurvivors, p-val : p value, PtCO₂ : Transcutaneous partial pressure in CO₂, PatCO₂ : arterio-tissular gradient in CO₂, ∆(d2-d1)PatCO₂ : PatCO₂ difference between day 2 and day 1.
